# Supplementary material for: A new optimized method in wellbore to improve gas recovery in shale reservoirs
Source: Frontiers journal article supplement (doi:10.3389/fenrg.2023.1336359), 2023-12-29
Supplement: Table_1.XLSX [file Table_1.XLSX]

## Sheet: eng
				50.3mm
	Slug flow			critical gas rate	Pwf
	critical gas rate	Pwf		41393.7	16
	10000	11.8758		38769.1	14
	20000	11.1836		35826.7	12
	40000	12.1218		32567.9	10
	60000	13.7226		29210.2	8
	80000	15.5599		24875.4	6
				20094.2	4
	Annular flow			114.3mm
	critical gas rate	Pwf		critical gas rate	Pwf
	10000	9.0236		79680	14
	20000	7.8562		73546.3	12
	40000	7.5569		66813.1	10
	60000	7.924		59313.3	8
	80000	8.5823		50960.4	6
				41209.4	4
	Wellhead pressurization
	critical gas rate	Pwf
	10000	5.7388
	20000	4.986
	40000	5.3376
	60000	6.351
	80000	7.5593
	Foam
	critical gas rate	Pwf
	31696.2	16
	29634.7	14
	27368.8	12
	24872.5	10
	22095.8	8
	18940.2	6
	15784.5	4
																	序号	产量	井底流压
																速度管柱前	1	80921.5	14.0265	1
																	2	79240.3	12.3576	2
																	3	77447.1	11.4834	3
																	4	74869.2	11.2848	4
																	5	73188	10.649	5
																	6	71394.8	10.1722	6
																	7	69041.1	9.7351	7
																	8	67247.8	9.37748	8
																速度管柱1	1	68032.4	11.9205	9
																	2	66014.9	11.404	10
																	3	62876.7	10.8477	11
																	4	58057.3	10.3311	12
																	5	54134.5	10.4901	13
																	6	49539.2	10.1722	14
																	7	45168.1	9.99404	15
																	8	42029.9	9.41722	16
																	9	37995	9.0596	17
													气举复产				10	34968.9	8.62252	18
																	11	31270.2	8.58278	19
										34744.7	12.755					气举复产	1	34744.7	12.755	20
										30934	12.6358						2	30934	12.6358	21
										28804.5	12.0795						3	28804.5	12.0795	22
																柱塞气举	1	30597.8	10.8477	23
																	2	29252.8	9.77483	24
																	3	27235.4	9.49669	25
																	4	26002.5	8.74172	26
										气举复产	1	34744.7	12.755				5	24769.6	7.4702	27
											2	30934	12.6358				6	23088.4	7.19205	28
											3	28804.5	12.0795				7	21071	6.87417	29
																	8	19726	6.31788	30
																	9	18493.2	6.83444	31
																	10	17372.4	6.07947	32
																	11	15803.2	5.84106	33
